# Supplementary material
Source: PubMed Central journal article supplement (PMC9090945)
Supplement: NIHMS1779397-supplement-1.pdf [file NIHMS1779397-supplement-1.pdf]

## Supplemental Appendix

### Table of Contents

Supplemental Table 1. Potentially nephrotoxic medications queried

Supplemental Table 2. Diagnosis codes utilized to assess for incident congestive heart failure, cardiovascular disease and peripheral vascular disease

Supplemental Table 3. Diagnosis codes utilized to assess for incident chronic kidney disease, end-stage renal disease and kidney transplantation

Supplemental Table 4. Outpatient serum creatinine measurements in the 6 months to 7 days prior to index hospitalization by baseline eGFR category

Supplemental Table 5. Potentially nephrotoxic medications prescribed during the 3-year follow up

Supplemental Table 6. Multivariable analysis inclusive of variables thought to be potentially associated with long-term kidney dysfunction risk

Supplemental Table 7. Unadjusted relative contribution to *de novo* or progressive CKD of each potentially nephrotoxic medication class ranked by highest to lowest c-statistic.

**Table S1.** Potentially nephrotoxic medications queried

| Medication Class        | Medications Queried <sup>a</sup>                                                       |                                                                                   |                                                                                    |
|-------------------------|----------------------------------------------------------------------------------------|-----------------------------------------------------------------------------------|------------------------------------------------------------------------------------|
| PPI                     | Dexlansoprazole<br>Esomeprazole                                                        | Lansoprazole<br>Omeprazole                                                        | Pantoprazole<br>Rabeprazole                                                        |
| Antibiotics             | Amikacin<br>Ciprofloxacin<br>Colistimethate<br>Gentamicin<br>Nafcillin                 | Oxacillin<br>Penicillin<br>Polymyxin<br>Rifampin                                  | Tobramycin<br>Trimethoprim /<br>Sulfamethoxazole<br>Vancomycin                     |
| Antifungals             | Amphotericin B                                                                         |                                                                                   |                                                                                    |
| Antivirals              | Abacavir<br>Acyclovir<br>Bictegravir<br>Dolutegravir<br>Efavirenz                      | Elvitegravir<br>Emtricitabine<br>Lamivudine<br>Lopinavir<br>Rilpivirine           | Ritonavir<br>Stavudine<br>Tenofovir                                                |
| NSAIDs                  | Celecoxib<br>Diclofenac<br>Ibuprofen                                                   | Indomethacin<br>Ketorolac<br>Meloxicam                                            | Nabumetone<br>Naproxen<br>Sulindac                                                 |
| Chemotherapeutic agents | Carboplatin<br>Cisplatin<br>Cyclophosphamide<br>Cytarabine<br>Gemcitabine<br>Ibrutinib | Ifosfamide<br>Imatinib<br>Irinotecan<br>Lenalidomide<br>Melphalan<br>Methotrexate | Oxaliplatin<br>Sorafenib<br>Temozolomide<br>Topotecan<br>Temozolomide<br>Topotecan |
| Immunosuppressants      | Tacrolimus                                                                             | Cyclosporine                                                                      |                                                                                    |

<sup>a</sup> All medications queried were in in a systemic formulation. Inhalation and topical routes were not included in our analysis.

**Table S2** Diagnosis codes utilized to assess for incident congestive heart failure, cardiovascular disease and peripheral vascular disease

|                          |        |                                                                                                                                                                                                                                                                                                                                                                                                                                                                                                                                                                                                                                                                                                                                                                                                                                                                                                                                                                                                                                                                                                                                                                                                                                                                                                                                           |
|--------------------------|--------|-------------------------------------------------------------------------------------------------------------------------------------------------------------------------------------------------------------------------------------------------------------------------------------------------------------------------------------------------------------------------------------------------------------------------------------------------------------------------------------------------------------------------------------------------------------------------------------------------------------------------------------------------------------------------------------------------------------------------------------------------------------------------------------------------------------------------------------------------------------------------------------------------------------------------------------------------------------------------------------------------------------------------------------------------------------------------------------------------------------------------------------------------------------------------------------------------------------------------------------------------------------------------------------------------------------------------------------------|
| Congestive Heart Failure | ICD-10 | I50.1, I50.20, I50.21, I50.22, I50.23, I50.30, I50.31, I50.32, I50.33, I50.40, I50.41, I50.42, I50.43, I50.8, I50.81, I50.810, I50.811, I50.812, I50.813, I50.814, I50.82, I50.83, I50.84, I50.89, I50.9                                                                                                                                                                                                                                                                                                                                                                                                                                                                                                                                                                                                                                                                                                                                                                                                                                                                                                                                                                                                                                                                                                                                  |
|                          | ICD-9  | 428, 428.0, 428.1, 428.2, 428.20, 428.21, 428.22, 428.23, 428.3, 428.30, 428.31, 428.32, 428.33, 428.4, 428.40, 428.41, 428.42, 428.43, 428.9                                                                                                                                                                                                                                                                                                                                                                                                                                                                                                                                                                                                                                                                                                                                                                                                                                                                                                                                                                                                                                                                                                                                                                                             |
| Cardiovascular Disease   | ICD-10 | I21.01, I21.02, I21.09, I21.11, I21.19, I21.21, I21.29, I21.3, I21.4, I21.9, I21.A, I21.A1, I21.A9, I22.0, I22.1, I22.2, I22.8, I22.9, I23.0, I23.1, I23.2, I23.3, I23.4, I23.5, I23.6, I23.7, I23.8, I25.2, I20.0, I20.1, I20.8, I20.9, I63.00, I63.011, I63.012, I63.013, I63.019, I63.02, I63.031, I63.032, I63.033, I63.039, I63.09, I63.10, I63.111, I63.112, I63.113, I63.119, I63.12, I63.131, I63.132, I63.133, I63.139, I63.19, I63.20, I63.211, I63.212, I63.213, I63.219, I63.22, I63.231, I63.232, I63.233, I63.239, I63.29, I63.30, I63.311, I63.312, I63.313, I63.319, I63.321, I63.322, I63.323, I63.329, I63.331, I63.332, I63.333, I63.339, I63.341, I63.342, I63.349, I63.39, I63.40, I63.411, I63.412, I63.413, I63.419, I63.421, I63.422, I63.423, I63.429, I63.431, I63.432, I63.433, I63.439, I63.441, I63.442, I63.449, I63.49, I63.50, I63.511, I63.512, I63.513, I63.519, I63.521, I63.522, I63.523, I63.529, I63.531, I63.532, I63.533, I63.539, I63.541, I63.542, I63.543, I63.549, I63.59, I63.6, I63.8, I63.81, I63.89, I63.9, I60.00, I60.01, I60.02, I60.10, I60.11, I60.12, I60.2, I60.20, I60.21, I60.22, I60.30, I60.31, I60.32, I60.4, I60.50, I60.51, I60.52, I60.6, I60.7, I60.8, I60.9, I61.0, I61.1, I61.2, I61.3, I61.4, I61.5, I61.6, I61.8, I61.9, I62.00, I62.01, I62.02, I62.03, I62.1, I62.9 |
|                          | ICD-9  | 410, 410.0, 410.00, 410.01, 410.02, 410.1, 410.10, 410.11, 410.12, 410.2, 410.20, 410.21, 410.22, 410.3, 410.30, 410.31, 410.32, 410.4, 410.40, 410.41, 410.42, 410.5, 410.50, 410.51, 410.52, 410.6, 410.60, 410.61, 410.62, 410.7, 410.70, 410.71, 410.72, 410.8, 410.80, 410.81, 410.82, 410.9, 410.90, 410.91, 410.92, 412, 411.1, 413, 413.0, 413.1, 413.9, 433, 433.0, 433.01, 433.1, 433.10, 433.11, 433.2, 433.21, 433.3, 433.31, 433.8, 433.81, 433.9, 433.91, 434, 434.0, 434.01, 434.1, 434.11, 434.9, 434.91, 436, 997.02, 430, 431, 432, 432.0, 432.1, 432.9, 997.02                                                                                                                                                                                                                                                                                                                                                                                                                                                                                                                                                                                                                                                                                                                                                         |

Peripheral Vascular Disease

ICD-10

E08.51, E08.52, E09.51, E09.52, E10.51, E10.52, E11.51, E11.52, E13.51, E13.52, I70.0, I70.1, I70.201, I70.202, I70.203, I70.208, I70.209, I70.211, I70.212, I70.213, I70.218, I70.219, I70.221, I70.222, I70.223, I70.228, I70.229, I70.231, I70.232, I70.233, I70.234, I70.235, I70.238, I70.239, I70.241, I70.242, I70.243, I70.244, I70.245, I70.248, I70.249, I70.25, I70.261, I70.262, I70.263, I70.268, I70.269, I70.291, I70.292, I70.293, I70.298, I70.299, I70.301, I70.302, I70.303, I70.308, I70.309, I70.311, I70.312, I70.313, I70.318, I70.319, I70.321, I70.322, I70.323, I70.328, I70.329, I70.331, I70.332, I70.333, I70.334, I70.335, I70.338, I70.339, I70.341, I70.342, I70.343, I70.344, I70.345, I70.348, I70.349, I70.35, I70.361, I70.362, I70.363, I70.368, I70.369, I70.391, I70.392, I70.393, I70.398, I70.399, I70.401, I70.402, I70.403, I70.408, I70.409, I70.411, I70.412, I70.413, I70.418, I70.419, I70.421, I70.422, I70.423, I70.428, I70.429, I70.431, I70.432, I70.433, I70.434, I70.435, I70.438, I70.439, I70.441, I70.442, I70.443, I70.444, I70.445, I70.448, I70.449, I70.45, I70.461, I70.462, I70.463, I70.468, I70.469, I70.491, I70.492, I70.493, I70.498, I70.499, I70.501, I70.502, I70.503, I70.508, I70.509, I70.511, I70.512, I70.513, I70.518, I70.519, I70.521, I70.522, I70.523, I70.528, I70.529, I70.531, I70.532, I70.533, I70.534, I70.535, I70.538, I70.539, I70.541, I70.542, I70.543, I70.544, I70.545, I70.548, I70.549, I70.55, I70.561, I70.562, I70.563, I70.568, I70.569, I70.591, I70.592, I70.593, I70.598, I70.599, I70.601, I70.602, I70.603, I70.608, I70.609, I70.611, I70.612, I70.613, I70.618, I70.619, I70.621, I70.622, I70.623, I70.628, I70.629, I70.631, I70.632, I70.633, I70.634, I70.635, I70.638, I70.639, I70.641, I70.642, I70.643, I70.644, I70.645, I70.648, I70.649, I70.65, I70.661, I70.662, I70.663, I70.668, I70.669, I70.691, I70.692, I70.693, I70.698, I70.699, I70.701, I70.702, I70.703, I70.708, I70.709, I70.711, I70.712, I70.713, I70.718, I70.719, I70.721, I70.722, I70.723, I70.728, I70.729, I70.731, I70.732, I70.733, I70.734, I70.735, I70.738, I70.739, I70.741, I70.742, I70.743, I70.744, I70.745, I70.748, I70.749, I70.75, I70.761, I70.762, I70.763, I70.768, I70.769, I70.791, I70.792, I70.793, I70.798, I70.799, I70.8, I70.90, I70.91, I70.92, I71.00, I71.01, I71.02, I71.03, I71.1, I71.2, I71.3, I71.4, I71.5, I71.6, I71.8, I71.9, I73.81, I73.89, I73.9

ICD-9

440, 440.0, 440.1, 440.2, 440.20, 440.21, 440.22, 440.23, 440.24, 440.29, 440.3, 440.30, 440.31, 440.32, 440.4, 440.8, 440.9, 441, 441.0, 441.00, 441.01, 441.02, 441.03, 441.1, 441.2, 441.3, 441.4, 441.5, 441.6, 441.7, 441.9, 442, 442.0, 442.1, 442.2, 442.3, 442.8, 442.81, 442.82, 442.83, 442.84, 442.89, 442.9, 443, 443.0, 443.1, 443.2, 443.21, 443.22, 443.23, 443.24, 443.29, 443.8, 443.81, 443.82, 443.89, 443.9, 785.4, V43.4, 996.1

Diabetes Mellitus

ICD-10

E08.00, E08.01, E08.10, E08.11, E08.21, E08.22, E08.29,  
E08.311, E08.319, E08.321, E08.321, E08.3211,  
E08.3212, E08.3213, E08.3219, E08.329, E08.329,  
E08.3291, E08.3292, E08.3293, E08.3299, E08.331,  
E08.331, E08.3311, E08.3312, E08.3313, E08.3319,  
E08.339, E08.339, E08.3391, E08.3392, E08.3393,  
E08.3399, E08.341, E08.341, E08.3411, E08.3412,  
E08.3413, E08.3419, E08.349, E08.349, E08.3491,  
E08.3492, E08.3493, E08.3499, E08.351, E08.351,  
E08.3511, E08.3512, E08.3513, E08.3519, E08.352,  
E08.3521, E08.3522, E08.3523, E08.3529, E08.353,  
E08.3531, E08.3532, E08.3533, E08.3539, E08.354,  
E08.3541, E08.3542, E08.3543, E08.3549, E08.355,  
E08.3551, E08.3552, E08.3553, E08.3559, E08.359,  
E08.359, E08.3591, E08.3592, E08.3593, E08.3599,  
E08.36, E08.37, E08.37X1, E08.37X2, E08.37X3,  
E08.37X9, E08.39, E08.40, E08.41, E08.42, E08.43,  
E08.44, E08.49, E08.51, E08.52, E08.59, E08.610,  
E08.618, E08.620, E08.621, E08.622, E08.628, E08.630,  
E08.638, E08.641, E08.649, E08.65, E08.69, E08.8,  
E08.9, E09.00, E09.01, E09.10, E09.11, E09.21, E09.22,  
E09.29, E09.311, E09.319, E09.321, E09.321, E09.3211,  
E09.3212, E09.3213, E09.3219, E09.329, E09.329,  
E09.3291, E09.3292, E09.3293, E09.3299, E09.331,  
E09.331, E09.3311, E09.3312, E09.3313, E09.3319,  
E09.339, E09.339, E09.3391, E09.3392, E09.3393,  
E09.3399, E09.341, E09.341, E09.3411, E09.3412,  
E09.3413, E09.3419, E09.349, E09.349, E09.3491,  
E09.3492, E09.3493, E09.3499, E09.351, E09.351,  
E09.3511, E09.3512, E09.3513, E09.3519, E09.352,  
E09.3521, E09.3522, E09.3523, E09.3529, E09.353,  
E09.3531, E09.3532, E09.3533, E09.3539, E09.354,  
E09.3541, E09.3542, E09.3543, E09.3549, E09.355,  
E09.3551, E09.3552, E09.3553, E09.3559, E09.359,  
E09.359, E09.3591, E09.3592, E09.3593, E09.3599,  
E09.36, E09.37, E09.37X1, E09.37X2, E09.37X3,  
E09.37X9, E09.39, E09.40, E09.41, E09.42, E09.43,  
E09.44, E09.49, E09.51, E09.52, E09.59, E09.610,  
E09.618, E09.620, E09.621, E09.622, E09.628, E09.630,  
E09.638, E09.641, E09.649, E09.65, E09.69, E09.8,  
E09.9, E10.10, E10.11, E10.21, E10.22, E10.29, E10.311,  
E10.319, E10.321, E10.321, E10.3211, E10.3212,  
E10.3213, E10.3219, E10.329, E10.329, E10.3291,  
E10.3292, E10.3293, E10.3299, E10.331, E10.331,  
E10.3311, E10.3312, E10.3313, E10.3319, E10.339,  
E10.339, E10.3391, E10.3392, E10.3393, E10.3399,  
E10.341, E10.341, E10.3411, E10.3412, E10.3413,  
E10.3419, E10.349, E10.349, E10.3491, E10.3492,

E10.3493, E10.3499, E10.351, E10.351, E10.3511,  
E10.3512, E10.3513, E10.3519, E10.352, E10.3521,  
E10.3522, E10.3523, E10.3529, E10.353, E10.3531,  
E10.3532, E10.3533, E10.3539, E10.354, E10.3541,  
E10.3542, E10.3543, E10.3549, E10.355, E10.3551,  
E10.3552, E10.3553, E10.3559, E10.359, E10.359,  
E10.3591, E10.3592, E10.3593, E10.3599, E10.36,  
E10.37, E10.37X1, E10.37X2, E10.37X3, E10.37X9,  
E10.39, E10.40, E10.41, E10.42, E10.43, E10.44, E10.49,  
E10.51, E10.52, E10.59, E10.610, E10.618, E10.620,  
E10.621, E10.622, E10.628, E10.630, E10.638, E10.641,  
E10.649, E10.65, E10.69, E10.8, E10.9, E11.00, E11.01,  
E11.1, E11.10, E11.11, E11.21, E11.22, E11.29, E11.311,  
E11.319, E11.321, E11.321, E11.3211, E11.3212,  
E11.3213, E11.3219, E11.329, E11.329, E11.3291,  
E11.3292, E11.3293, E11.3299, E11.331, E11.331,  
E11.3311, E11.3312, E11.3313, E11.3319, E11.339,  
E11.339, E11.3391, E11.3392, E11.3393, E11.3399,  
E11.341, E11.341, E11.3411, E11.3412, E11.3413,  
E11.3419, E11.349, E11.349, E11.3491, E11.3492,  
E11.3493, E11.3499, E11.351, E11.351, E11.3511,  
E11.3512, E11.3513, E11.3519, E11.352, E11.3521,  
E11.3522, E11.3523, E11.3529, E11.353, E11.3531,  
E11.3532, E11.3533, E11.3539, E11.354, E11.3541,  
E11.3542, E11.3543, E11.3549, E11.355, E11.3551,  
E11.3552, E11.3553, E11.3559, E11.359, E11.359,  
E11.3591, E11.3592, E11.3593, E11.3599, E11.36,  
E11.37, E11.37X1, E11.37X2, E11.37X3, E11.37X9,  
E11.39, E11.40, E11.41, E11.42, E11.43, E11.44, E11.49,  
E11.51, E11.52, E11.59, E11.610, E11.618, E11.620,  
E11.621, E11.622, E11.628, E11.630, E11.638, E11.641,  
E11.649, E11.65, E11.69, E11.8, E11.9, E13.00, E13.01,  
E13.10, E13.11, E13.21, E13.22, E13.29, E13.311,  
E13.319, E13.321, E13.321, E13.3211, E13.3212,  
E13.3213, E13.3219, E13.329, E13.329, E13.3291,  
E13.3292, E13.3293, E13.3299, E13.331, E13.331,  
E13.3311, E13.3312, E13.3313, E13.3319, E13.339,  
E13.339, E13.3391, E13.3392, E13.3393, E13.3399,  
E13.341, E13.341, E13.3411, E13.3412, E13.3413,  
E13.3419, E13.349, E13.349, E13.3491, E13.3492,  
E13.3493, E13.3499, E13.351, E13.351, E13.3511,  
E13.3512, E13.3513, E13.3519, E13.352, E13.3521,  
E13.3522, E13.3523, E13.3529, E13.353, E13.3531,  
E13.3532, E13.3533, E13.3539, E13.354, E13.3541,  
E13.3542, E13.3543, E13.3549, E13.355, E13.3551,  
E13.3552, E13.3553, E13.3559, E13.359, E13.359,  
E13.3591, E13.3592, E13.3593, E13.3599, E13.36,  
E13.37, E13.37X1, E13.37X2, E13.37X3, E13.37X9,

|                        |        |                                                                                                                                                                                                                                                                                                                                                                                                           |
|------------------------|--------|-----------------------------------------------------------------------------------------------------------------------------------------------------------------------------------------------------------------------------------------------------------------------------------------------------------------------------------------------------------------------------------------------------------|
|                        |        | E13.39, E13.40, E13.41, E13.42, E13.43, E13.44, E13.49, E13.51, E13.52, E13.59, E13.610, E13.618, E13.620, E13.621, E13.622, E13.628, E13.630, E13.638, E13.641, E13.649, E13.65, E13.69, E13.8, E13.9                                                                                                                                                                                                    |
|                        | ICD-9  | 250, 250.0, 250.00, 250.01, 250.02, 250.03, 250.1, 250.10, 250.11, 250.12, 250.13, 250.2, 250.20, 250.21, 250.22, 250.23, 250.3, 250.30, 250.31, 250.32, 250.33, 250.4, 250.40, 250.41, 250.42, 250.43, 250.5, 250.50, 250.51, 250.52, 250.53, 250.6, 250.60, 250.61, 250.62, 250.63, 250.7, 250.70, 250.71, 250.72, 250.73, 250.8, 250.80, 250.81, 250.82, 250.83, 250.9, 250.90, 250.91, 250.92, 250.93 |
|                        | ICD-10 | I67.4, I16.9, I16.1, I16.0, I16, I15.9, I15.8, I15.2, I15.1, I15.0, I13.2, I13.11, I13.10, I13.0, I12.9, I12.0, I11.9, I11.0, I10, H35.039, H35.033, H35.032, H35.031                                                                                                                                                                                                                                     |
| Hypertension           | ICD-9  | 437.2, 405.99, 405.91, 405.9, 405.19, 405.11, 405.1, 405.09, 405.01, 405.0, 405, 404.93, 404.92, 404.91, 404.90, 404.9, 404.13, 404.12, 404.11, 404.10, 404.1, 404.03, 404.02, 404.01, 404.00, 404.0, 404, 403.91, 403.90, 403.9, 403.11, 403.10, 403.1, 403.01, 403.00, 403.0, 403, 402.91, 402.90, 402.9, 402.11, 402.10, 402.1, 402.01, 402.00, 402.0, 402, 401.9, 401.1, 401.0, 401, 362.11           |
| Pulmonary Hypertension | ICD-10 | I27.29, I27.24, I27.23, I27.22, I27.21, I27.20, I27.2, I27.0                                                                                                                                                                                                                                                                                                                                              |
|                        | ICD-9  | 416.0                                                                                                                                                                                                                                                                                                                                                                                                     |
| Cirrhosis              | ICD-10 | K74.69, K74.60, K74.5, K74.4, K74.3, K70.31, K70.30                                                                                                                                                                                                                                                                                                                                                       |
|                        | ICD-9  | 571.6, 571.5, 571.2, 571                                                                                                                                                                                                                                                                                                                                                                                  |

---

**Table S3** Diagnosis codes utilized to assess for incident chronic kidney disease, end-stage renal disease and kidney transplantation

|                         |        |                                                                                                                                                                                                                                                                                                                                                         |
|-------------------------|--------|---------------------------------------------------------------------------------------------------------------------------------------------------------------------------------------------------------------------------------------------------------------------------------------------------------------------------------------------------------|
|                         | ICD-10 | I12.0, I12.9, I13.0, I13.10, I13.11, I13.2, N18.1, N18.2, N18.3, N18.4, N18.5, N18.6, N18.9, D63.1, E08.22, E09.22, E10.22, E11.22, E13.22, O10.211, O10.212, O10.213, O10.219, O10.22, O10.23, O10.311, O10.312, O10.313, O10.319, O10.32, O10.33                                                                                                      |
| Chronic Kidney Disease  | ICD-9  | 250.40, 250.41, 250.42, 250.43, 249.40, 285.21, 403, 403.0, 403.00, 403.01, 403.1, 403.10, 403.11, 403.9, 403.90, 403.91, 404, 404.0, 404.00, 404.01, 404.02, 404.03, 404.1, 404.10, 404.11, 404.12, 404.13, 404.9, 404.90, 404.91, 404.92, 404.93, 585, 585.1, 585.2, 585.3, 585.4, 585.5, 585.6, 585.9, 642.1, 642.10, 642.11, 642.12, 642.13, 642.14 |
| End-stage Renal Disease | ICD-10 | N18.6, T85.691A, T85.691D, T85.691S, T85.71XA, T85.71XD, T85.71XS, Z48.22, Z49.01, Z49.02, Z49.31, Z49.32, Z91.15, Z94.0, Z99.2                                                                                                                                                                                                                         |
|                         | ICD-9  | 34151110, 09964120, 09997110, 34503110, 34503111, 34199716                                                                                                                                                                                                                                                                                              |
| Kidney Transplantation  | ICD-10 | T86.10, T86.11, T86.12, T86.13, T86.19, Z48.22, Z94.0                                                                                                                                                                                                                                                                                                   |
|                         | ICD-9  | V42.0, 996.81                                                                                                                                                                                                                                                                                                                                           |



**Table S4.** Outpatient serum creatinine measurements in the 6 months to 7 days prior to index hospitalization by baseline eGFR category

|              | Baseline GFR Category |               |                |                |               |             |                   | p value |
|--------------|-----------------------|---------------|----------------|----------------|---------------|-------------|-------------------|---------|
|              | G1<br>(N=316)         | G2<br>(N=804) | G3A<br>(N=951) | G3B<br>(N=236) | G4<br>(N=145) | G5<br>(N=9) | Total<br>(N=2461) |         |
| Median (IQR) | 1 (1, 2)              | 1 (0, 2)      | 0 (0, 1)       | 2 (1, 4)       | 2 (1, 4)      | 2 (2, 3)    | 1 (0, 2)          | <0.001  |
| Range        | (0-14)                | (0-32)        | (0-20)         | (0-12)         | (0-13)        | (0-5)       | (0-32)            |         |
| Count        |                       |               |                |                |               |             |                   |         |
| 0            | 58 (18.4%)            | 277 (34.5%)   | 655 (68.9%)    | 30 (12.7%)     | 23 (15.9%)    | 1 (11.1%)   | 1044 (42.4%)      |         |
| 1            | 120 (38.0%)           | 255 (31.7%)   | 137 (14.4%)    | 73 (30.9%)     | 40 (27.6%)    | 1 (11.1%)   | 626 (25.4%)       |         |
| 2            | 66 (20.9%)            | 138 (17.2%)   | 76 (8.0%)      | 41 (17.4%)     | 22 (15.2%)    | 4 (44.4%)   | 347 (14.1%)       |         |
| 3            | 29 (9.2%)             | 49 (6.1%)     | 31 (3.3%)      | 21 (8.9%)      | 22 (15.2%)    | 1 (11.1%)   | 153 (6.2%)        |         |
| 4            | 15 (4.7%)             | 27 (3.4%)     | 16 (1.7%)      | 31 (13.1%)     | 10 (6.9%)     | 0 (0.0%)    | 99 (4.0%)         |         |
| 5            | 8 (2.5%)              | 19 (2.4%)     | 7 (0.7%)       | 11 (4.7%)      | 11 (7.6%)     | 2 (22.2%)   | 58 (2.4%)         |         |
| 6            | 3 (0.9%)              | 13 (1.6%)     | 4 (0.4%)       | 11 (4.7%)      | 5 (3.4%)      | 0 (0.0%)    | 36 (1.5%)         |         |
| 7            | 4 (1.3%)              | 10 (1.2%)     | 7 (0.7%)       | 6 (2.5%)       | 3 (2.1%)      | 0 (0.0%)    | 30 (1.2%)         |         |
| 8            | 6 (1.9%)              | 6 (0.7%)      | 8 (0.8%)       | 3 (1.3%)       | 1 (0.7%)      | 0 (0.0%)    | 24 (1.0%)         |         |
| 9            | 0 (0.0%)              | 3 (0.4%)      | 5 (0.5%)       | 3 (1.3%)       | 2 (1.4%)      | 0 (0.0%)    | 13 (0.5%)         |         |
| 10+          | 7 (2.2%)              | 7 (0.9%)      | 5 (0.5%)       | 6 (2.5%)       | 6 (4.1%)      | 0 (0.0%)    | 31 (1.3%)         |         |

**Table S5.** Potentially nephrotoxic medications prescribed during the 3-year follow up

| Medication Classes Prescribed | Patients Prescribed Medication in Class (%), n=2461 | Medications prescribed | Patients Prescribed Medication (%) |
|-------------------------------|-----------------------------------------------------|------------------------|------------------------------------|
| PPI                           | 1556 (63)                                           | Omeprazole             | 1135 (46)                          |
|                               |                                                     | Pantoprazole           | 529 (21)                           |
|                               |                                                     | Lansoprazole           | 71 (3)                             |
|                               |                                                     | Esomeprazole           | 62 (3)                             |
|                               |                                                     | Rabeprazole            | 13 (0)                             |
|                               |                                                     | Dexlansoprazole        | 3 (0)                              |
| Antibiotics                   | 1160 (47)                                           | Ciprofloxacin          | 773 (31)                           |
|                               |                                                     | SMX/TMP                | 543 (22)                           |
|                               |                                                     | Vancomycin             | 127 (5)                            |
|                               |                                                     | Rifampin               | 17 (1)                             |
|                               |                                                     | Trimethoprim           | 16 (1)                             |
|                               |                                                     | Gentamicin             | 7 (0)                              |
|                               |                                                     | Nafcillin              | 5 (0)                              |
|                               |                                                     | Penicillin             | 1 (0)                              |
|                               |                                                     | Oxacillin              | 1 (0)                              |
| NSAIDs                        | 600 (24)                                            | Ibuprofen              | 327 (13)                           |
|                               |                                                     | Naproxen               | 203 (8)                            |
|                               |                                                     | Indomethacin           | 58 (2)                             |
|                               |                                                     | Celecoxib              | 39 (2)                             |
|                               |                                                     | Nabumetone             | 29 (1)                             |
|                               |                                                     | Diclofenac             | 20 (1)                             |
|                               |                                                     | Ketorolac              | 19 (1)                             |
|                               |                                                     | Meloxicam              | 13 (1)                             |
| Sulindac                      | 3 (0)                                               |                        |                                    |
| Antivirals                    | 233 (9)                                             | Valacyclovir           | 120 (5)                            |
|                               |                                                     | Acyclovir              | 105 (4)                            |
|                               |                                                     | Valganciclovir         | 24 (1)                             |
|                               |                                                     | Tenofovir              | 7 (0)                              |
|                               |                                                     | Ribavirin              | 6 (0)                              |
|                               |                                                     | Emtricitabine          | 3 (0)                              |
|                               |                                                     | Ganciclovir            | 5 (0)                              |
|                               |                                                     | Lamivudine             | 5 (0)                              |
|                               |                                                     | Abacavir               | 3 (0)                              |
|                               |                                                     | Entecavir              | 2 (0)                              |
|                               |                                                     | Raltegravir            | 2 (0)                              |
|                               |                                                     | Efavirenz              | 1 (0)                              |
|                               |                                                     | Lopinavir              | 1 (0)                              |
|                               |                                                     | Dolutegravir           | 1 (0)                              |
| Ritonavir                     | 1 (0)                                               |                        |                                    |
| Chemotherapy                  | 105 (4)                                             | Methotrexate           | 36 (1)                             |
|                               |                                                     | Cyclophosphamide       | 27 (1)                             |
|                               |                                                     | Lenalidomide           | 13 (1)                             |
|                               |                                                     | Carboplatin            | 12 (0)                             |
|                               |                                                     | Gemcitabine            | 9 (0)                              |
|                               |                                                     | Oxaliplatin            | 8 (0)                              |
|                               |                                                     | Sorafenib              | 7 (0)                              |
|                               |                                                     | Cisplatin              | 5 (0)                              |
|                               |                                                     | Melphalan              | 4 (0)                              |
| Temozolomide                  | 4 (0)                                               |                        |                                    |

|                    |        |              |        |
|--------------------|--------|--------------|--------|
|                    |        | Etoposide    | 3 (0)  |
|                    |        | Irinotecan   | 3 (0)  |
|                    |        | Topotecan    | 3 (0)  |
|                    |        | Ibrutinib    | 2 (0)  |
|                    |        | Imatinib     | 1 (0)  |
| Immunosuppressants | 44 (2) | Tacrolimus   | 32 (1) |
|                    |        | Cyclosporine | 17 (1) |

PPI: Proton pump inhibitor, SMX/TMP: sulfamethoxazole/trimethoprim NSAID: Non-steroidal anti-inflammatory drug

**Table S6.** Multivariable analysis inclusive of variables thought to be potentially associated with long-term kidney dysfunction risk

|                                                  | <b>De novo or progressive CKD by either diagnosis code or eGFR decline<sup>a</sup></b> |         | <b>Composite of de novo or progressive CKD, readmission with AKI or death<sup>b</sup></b> |         |
|--------------------------------------------------|----------------------------------------------------------------------------------------|---------|-------------------------------------------------------------------------------------------|---------|
|                                                  | Hazard Ratio (95% CI)                                                                  | P value | Hazard Ratio (95% CI)                                                                     | P value |
| Nephrotoxin count (per 1 (t.d.))                 | 1.26 (1.18-1.35)                                                                       | <0.001  | 1.28 (1.21-1.36)                                                                          | <0.001  |
| Male Sex                                         | 0.93 (0.83-1.04)                                                                       | 0.21    | 1.04 (0.94-1.15)                                                                          | 0.43    |
| Age (per decade)                                 | 1.07 (1.03-1.12)                                                                       | 0.002   | 1.13 (1.09-1.18)                                                                          | <0.001  |
| Hospital length of stay (per week)               | 1.08 (1.03-1.14)                                                                       | 0.001   | 1.09 (1.05-1.14)                                                                          | <0.001  |
| In ICU during hospitalization                    | 0.94 (0.83-1.06)                                                                       | 0.29    | 0.98 (0.87-1.10)                                                                          | 0.71    |
| BMI (per 5 kg/m <sup>2</sup> )                   | 0.99 (0.96-1.03)                                                                       | 0.60    | 0.95 (0.92-0.98)                                                                          | 0.001   |
| Baseline eGFR (per 5 mL/min/1.73m <sup>2</sup> ) | 0.97 (0.95-0.98)                                                                       | <0.001  | 0.97 (0.96-0.98)                                                                          | <0.001  |
| Cardiovascular disease                           | 1.11 (0.96-1.28)                                                                       | 0.16    | 1.13 (0.99-1.28)                                                                          | 0.065   |
| Congestive heart failure                         | 1.48 (1.30-1.70)                                                                       | <0.001  | 1.40 (1.24-1.58)                                                                          | <0.001  |
| Peripheral vascular disease                      | 1.30 (1.14-1.47)                                                                       | <0.001  | 1.17 (1.04-1.31)                                                                          | 0.009   |
| Maximum AKI severity                             |                                                                                        |         |                                                                                           |         |
| 1                                                | 1.10 (0.89-1.36)                                                                       | 0.40    | 0.95 (0.79-1.15)                                                                          | 0.60    |
| 2                                                | 1.05 (0.83-1.33)                                                                       | 0.70    | 0.96 (0.77-1.19)                                                                          | 0.68    |
| 3                                                | Reference                                                                              |         | Reference                                                                                 |         |
| Persistent AKI                                   | 0.86 (0.75-0.98)                                                                       | 0.021   | 0.83 (0.74-0.93)                                                                          | 0.002   |
| Δ eGFR during hosp. (per +5 mg/dL)               | 0.88 (0.86-0.90)                                                                       | <0.001  | 0.91 (0.89-0.92)                                                                          | <0.001  |

CKD: chronic kidney disease; eGFR: estimated glomerular filtration rate; AKI: acute kidney injury; t.d.: time-dependent; ICU: intensive care unit; BMI: body mass index; hosp.: hospitalization

<sup>a</sup>: C-statistic = 0.658 (standard error = 0.008)

<sup>b</sup>: C-statistic = 0.648 (standard error = 0.007)

**Table S7.** Unadjusted relative contribution to *de novo* or progressive CKD of each potentially nephrotoxic medication class ranked by highest to lowest c-statistic.

| Medication Class  | Hazard Ratio <sup>a</sup> | P-value | C-statistic <sup>b</sup> |
|-------------------|---------------------------|---------|--------------------------|
| PPI               | 1.35 (1.20-1.52)          | <0.001  | 0.53 (0.007)             |
| Antibiotic        | 1.91 (1.56-2.34)          | <0.001  | 0.52 (0.004)             |
| Immunosuppressant | 2.47 (1.62-3.77)          | <0.001  | 0.51 (0.002)             |
| NSAID             | 0.91 (0.74-1.13)          | 0.39    | 0.51 (0.004)             |
| Antiviral         | 1.32 (0.93-1.86)          | 0.12    | 0.50 (0.003)             |
| Chemotherapy      | 1.28 (0.78-2.09)          | 0.33    | 0.50 (0.002)             |

PPI: proton pump inhibitor; NSAID: non-steroidal anti-inflammatory drug

<sup>a</sup>: Reported as hazard ratio (95% confidence interval)

<sup>b</sup>: Reported as c-statistic (standard error)
